# Supplementary material for: What do dust sinks tell us about their sources and past environmental dynamics? A case study for oxygen isotope stages 3–2 in the Middle Rhine Valley, Germany
Source: Copernicus journal article supplement (doi:10.5194/egqsj-72-163-2023), 2023-08-04
Supplement: Supplementary file 1 [file egqsj-72-163-2023-supplement.zip]

Archive with 5 entries (5 files):
- egqsj-72-163-2023-supplement-title-page.pdf
- Table ST2.xlsx
- egqsj-2022-8_supplement.pdf
- Table ST3.xlsx
- Table ST1.xlsx
