# Supplementary material for: What do dust sinks tell us about their sources and past environmental dynamics? A case study for oxygen isotope stages 3–2 in the Middle Rhine Valley, Germany
Source: Copernicus journal article supplement (doi:10.5194/egqsj-72-163-2023), 2023-08-04
Supplement: Supplementary file 1 [file egqsj-72-163-2023-supplement.zip › egqsj-72-163-2023-supplement-title-page.pdf]

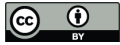

*Supplement of*

**What do dust sinks tell us about their sources and past environmental dynamics? A case study for oxygen isotope stages 3–2 in the Middle Rhine Valley, Germany**

**Mathias Vinnepand et al.**

*Correspondence to:* Mathias Vinnepand (mavinnep@uni-mainz.de) and Peter Fischer (p.fischer@geo.uni-mainz.de)

- egqsj-72-163-2023-supplement-title-page.pdf
- Table ST1.xlsx
- Table ST2.xlsx
- Table ST3.xlsx
- egqsj-2022-8\_supplement.pdf

The copyright of individual parts of the supplement might differ from the article licence.
