# Supplementary material for: What do dust sinks tell us about their sources and past environmental dynamics? A case study for oxygen isotope stages 3–2 in the Middle Rhine Valley, Germany
Source: Copernicus journal article supplement (doi:10.5194/egqsj-72-163-2023), 2023-08-04
Supplement: Supplementary file 1 [file egqsj-72-163-2023-supplement.zip › Table ST1.xlsx]

## Sheet: Age Model_Proxy_Lower
SSU	SU	Depth [cm]	Age [years]*	U-ratio	< 0,2 [μm]	LOG Si_Al	LOG Ti_Al	LOG Sr_Rb	Sedimentation rate [mm/yr]**	Env. Magnetic Sample depth [m]	mass susc 300Hz [m3/kg]	mass susc 3000Hz [m3/kg]	Delta Susc [m3/kg]	mag sus (fd) [%]
E	12	262	30821	2.83066	1.38305	1.54316	-2.41593	1.09137	0.156	2.61	2.26e-07	2.18e-07	8e-09	3.54
E	12	264	30890	3.0833	1.30231	1.46852	-2.5157	1.07292	0.289855	2.63	2.03e-07	1.96e-07	6.5e-09	3.2
E	12	266	30964	3.02876	1.34882	1.45217	-2.59293	1.1017	0.27027	2.65	2.03e-07	1.97e-07	5.76e-09	2.84
E	12	268	31034	2.98819	1.29002	1.46242	-2.58571	1.07848	0.285714	2.67	2.02e-07	1.96e-07	6.3e-09	3.12
E	12	270	31102	3.14327	1.30169	1.44789	-2.61328	1.10727	0.294118	2.69	1.91e-07	1.85e-07	5.81e-09	3.04
E	12	272	31165	2.88135	1.33977	1.47119	-2.48502	1.20165	0.31746	2.71	1.92e-07	1.86e-07	6.24e-09	3.25
E	12	274	31226	2.81966	1.361	1.42665	-2.6536	1.20901	0.327869	2.73	1.86e-07	1.81e-07	4.79e-09	2.57
E	12	276	31291	3.02881	1.30736	1.4128	-2.64498	1.23219	0.307692	2.75	1.84e-07	1.79e-07	4.28e-09	2.33
E	12	278	31361	2.77045	1.3174	1.42081	-2.64275	1.29446	0.285714	2.77	1.88e-07	1.82e-07	5.7e-09	3.03
E	12	280	31430	2.91389	1.31603	1.39105	-2.64873	1.16263	0.289855	2.79	1.88e-07	1.83e-07	5.08e-09	2.7
E	11	282	31498	2.78738	1.33697	1.41151	-2.66821	1.1432	0.294118	2.81	1.95e-07	1.89e-07	6.19e-09	3.17
E	11	284	31544	2.61935	1.37768	1.40342	-2.6463	1.0665	0.434783	2.83	1.87e-07	1.84e-07	3.52e-09	1.88
E	11	286	31592	2.5817	1.39072	1.44103	-2.64359	1.05458	0.416667	2.85	1.81e-07	1.79e-07	2.28e-09	1.26
E	11	288	31639	2.58943	1.34307	1.39855	-2.65887	1.15775	0.425532	2.87	1.83e-07	1.82e-07	1.41e-09	0.77
E	11	290	31683	2.64681	1.3495	1.46039	-2.65394	1.38089	0.454545	2.89	1.86e-07	1.84e-07	1.77e-09	0.95
E	11	292	31728	2.28191	1.55715	1.42399	-2.67477	1.36911	0.444444	2.91	1.97e-07	1.95e-07	2.33e-09	1.18
E	11	294	31772	2.28202	1.54148	1.44083	-2.66857	1.32847	0.454545	2.93	1.98e-07	1.96e-07	2.08e-09	1.05
E	11	296	31815	2.21919	1.65397	1.46835	-2.62115	1.33893	0.465116	2.95	1.97e-07	1.95e-07	1.74e-09	0.88
E	11	298	31858	2.28615	1.56175	1.46779	-2.67648	1.32053	0.465116	2.97	1.96e-07	1.95e-07	1.12e-09	0.57
E	11	300	31898	2.25235	1.73827	1.48608	-2.61426	1.32333	0.5	2.99	1.95e-07	1.93e-07	1.84e-09	0.94
E	11	302	31941	2.3556	1.55901	1.41682	-2.64712	1.32259	0.465116	3.01	2e-07	1.98e-07	2.34e-09	1.17
E	11	304	31983	2.31667	1.67462	1.38293	-2.70276	1.2932	0.47619	3.03	1.98e-07	1.96e-07	1.74e-09	0.88
E	10	306	32023	2.39426	1.59866	1.40441	-2.68487	1.3109	0.5	3.05	2.01e-07	1.99e-07	1.67e-09	0.83
E	10	308	32063	2.45362	1.50624	1.49982	-2.63578	1.30553	0.5	3.07	1.97e-07	1.97e-07	6.21e-10	0.31
E	10	310	32101	2.48408	1.46378	1.39879	-2.69082	1.30411	0.526316	3.09	1.98e-07	1.96e-07	2.14e-09	1.08
E	10	312	32142	2.55011	1.44915	1.46183	-2.65495	1.33924	0.487805	3.11	1.98e-07	1.97e-07	3.17e-10	0.16
E	10	314	32181	2.6083	1.41897	1.40195	-2.62304	1.32215	0.512821	3.13	1.96e-07	1.95e-07	5.89e-10	0.3
E	10	316	32220	2.66546	1.34353	1.47193	-2.61944	1.35854	0.512821	3.15	1.96e-07	1.95e-07	1.83e-09	0.93
E	10	318	32261	2.71547	1.30988	1.43374	-2.65702	1.32511	0.487805	3.17	1.95e-07	1.94e-07	5.62e-10	0.29
E	10	320	32303	2.84542	1.28105	1.40328	-2.64408	1.39261	0.47619	3.19	2.07e-07	2.05e-07	2.08e-09	1.01
E	10	322	32342	3.14131	1.25135	1.42006	-2.64684	1.44117	0.512821	3.21	1.98e-07	1.97e-07	9.5e-10	0.48
E	10	324	32380	3.13862	1.19901	1.42093	-2.66446	1.50276	0.526316	3.23	1.97e-07	1.95e-07	1.35e-09	0.69
E	9	326	32418	2.98897	1.2461	1.48419	-2.63182	1.54098	0.526316	3.25	1.95e-07	1.92e-07	2.22e-09	1.14
E	9	328	32456	3.00719	1.23063	1.41967	-2.66167	1.4389	0.526316	3.27	1.95e-07	1.94e-07	1.36e-09	0.69
E	9	330	32495	2.92682	1.29094	1.47485	-2.63886	1.4178	0.512821	3.29	1.97e-07	1.96e-07	1.65e-09	0.84
E	9	332	32535	3.06465	1.23423	1.43584	-2.66448	1.35684	0.5	3.31	2.15e-07	2.14e-07	8.36e-10	0.39
E	9	334	32573	2.98371	1.22459	1.39557	-2.66029	1.40649	0.526316	3.33	1.93e-07	1.91e-07	2.21e-09	1.14
E	9	336	32610	2.94817	1.26139	1.43097	-2.66067	1.4924	0.540541	3.35	1.87e-07	1.86e-07	1.42e-09	0.76
E	9	338	32652	2.82967	1.32658	1.44912	-2.641	1.46107	0.47619	3.37	1.87e-07	1.86e-07	1.83e-09	0.97
E	9	340	32693	2.84243	1.34557	1.38882	-2.67536	1.29012	0.487805	3.39	1.88e-07	1.85e-07	2.73e-09	1.45
E	9	342	32732	2.97505	1.28537	1.41975	-2.64442	1.31545	0.512821	3.41	1.86e-07	1.85e-07	1.55e-09	0.83
E	9	344	32766	3.01544	1.28393	1.44569	-2.61825	1.27381	0.588235	3.43	1.94e-07	1.9e-07	4.62e-09	2.38
E	9	346	32804	3.02565	1.32737	1.37528	-2.67583	1.33807	0.526316	3.45	1.88e-07	1.87e-07	6.22e-10	0.33
E	9	348	32842	3.02054	1.27046	1.37888	-2.6411	1.31381	0.526316	3.47	1.86e-07	1.84e-07	2.33e-09	1.25
E	9	350	32881	3.03931	1.29029	1.4259	-2.65577	1.34334	0.512821	3.49	1.86e-07	1.84e-07	2.24e-09	1.2
E	9	352	32921	3.01062	1.28169	1.36866	-2.67426	1.28415	0.5	3.51	1.88e-07	1.86e-07	2.22e-09	1.18
E	9	354	32979	2.94919	1.26923	1.38444	-2.66597	1.33123	0.344828	3.53	1.82e-07	1.81e-07	1.11e-09	0.61
D	8	356	33041	2.95952	1.28211	1.3853	-2.64462	1.15514	0.322581	3.55	1.78e-07	1.77e-07	8.44e-10	0.47
D	8	358	33104	3.04373	1.22223	1.32639	-2.67233	1.20985	0.31746	3.57	1.85e-07	1.82e-07	2.28e-09	1.24
D	8	360	33163	2.79463	1.28143	1.33595	-2.71706	1.32287	0.338983	3.59	1.8e-07	1.79e-07	7.84e-10	0.44
D	8	362	33220	2.60231	1.34747	1.35638	-2.7065	1.28487	0.350877	3.61	1.91e-07	1.89e-07	1.43e-09	0.75
D	8	364	33267	2.51309	1.37892	1.34079	-2.70849	1.22319	0.425532	3.63	1.92e-07	1.9e-07	1.99e-09	1.04
D	8	366	33318	2.39887	1.52965	1.34818	-2.69606	1.21535	0.392157	3.65	1.74e-07	1.72e-07	2.34e-09	1.35
D	8	368	33370	2.27965	1.70412	1.35849	-2.69154	1.15702	0.384615	3.67	1.74e-07	1.73e-07	1.55e-09	0.89
D	8	370	33420	2.25244	1.68405	1.37898	-2.66789	1.11278	0.4	3.69	1.72e-07	1.69e-07	3.52e-09	2.04
D	8	372	33468	2.24138	1.7575	1.37709	-2.70629	1.12223	0.416667	3.71	1.69e-07	1.68e-07	1.62e-09	0.95
D	8	374	33515	2.25989	1.76202	1.38134	-2.66985	1.12263	0.425532	3.73	1.68e-07	1.66e-07	1.62e-09	0.96
D	8	376	33560	2.28527	1.76313	1.36971	-2.69646	1.11625	0.444444	3.75	1.69e-07	1.67e-07	1.78e-09	1.06
D	8	378	33605	2.2775	1.76631	1.41663	-2.6673	1.12668	0.444444	3.77	1.71e-07	1.66e-07	4.61e-09	2.7
D	8	380	33652	2.31649	1.68845	1.35001	-2.71717	1.11515	0.425532	3.79	1.72e-07	1.68e-07	3.62e-09	2.1
D	7	382	33695	2.33093	1.64708	1.38087	-2.68307	1.10974	0.465116	3.81	1.69e-07	1.68e-07	8.13e-10	0.48
D	7	384	33733	2.4272	1.51554	1.35377	-2.70913	1.12783	0.526316	3.83	1.7e-07	1.66e-07	3.03e-09	1.79
D	7	386	33776	2.44937	1.56033	1.36114	-2.69847	1.07246	0.465116	3.85	1.74e-07	1.7e-07	4.25e-09	2.44
D	7	388	33820	2.52602	1.44821	1.37327	-2.6926	1.0928	0.454545	3.87	1.71e-07	1.69e-07	2.22e-09	1.3
D	7	390	33864	2.71524	1.34388	1.37839	-2.6724	1.0626	0.454545	3.89	1.73e-07	1.7e-07	2.68e-09	1.55
D	7	392	33906	2.80144	1.33031	1.37068	-2.67897	1.0728	0.47619	3.91	1.73e-07	1.7e-07	2.76e-09	1.6
D	7	394	33947	2.76273	1.3367	1.41167	-2.63727	1.10394	0.487805	3.93	1.72e-07	1.7e-07	2.62e-09	1.52
D	7	396	33993	2.87789	1.3189	1.4276	-2.62566	1.17155	0.434783	3.95	1.73e-07	1.7e-07	3.42e-09	1.97
D	7	398	34037	2.80103	1.31096	1.39078	-2.67392	1.16384	0.454545	3.97	1.74e-07	1.71e-07	3.14e-09	1.81
D	7	400	34083	2.99872	1.26942	1.38038	-2.70033	1.21126	0.434783	3.99	1.73e-07	1.71e-07	1.63e-09	0.94
D	7	402	34124	2.93912	1.27495	1.37711	-2.67353	1.12348	0.487805	4.01	1.74e-07	1.69e-07	5.54e-09	3.18
D	7	404	34162	3.05276	1.25801	1.3447	-2.67736	1.02826	0.526316	4.03	1.72e-07	1.67e-07	4.41e-09	2.56
D	7	406	34201	2.89833	1.31148	1.4112	-2.66034	1.08698	0.512821	4.05	1.73e-07	1.68e-07	4.67e-09	2.7
D	7	408	34240	3.0349	1.27591	1.34467	-2.65602	0.967541	0.512821	4.07	1.76e-07	1.71e-07	5.17e-09	2.93
D	7	410	34279	2.96313	1.24819	1.31554	-2.70361	0.953747	0.512821	4.09	1.73e-07	1.68e-07	5.64e-09	3.25
D	7	412	34317	3.0217	1.27179	1.35478	-2.65104	0.943966	0.526316	4.11	1.72e-07	1.68e-07	4.21e-09	2.45
D	7	414	34358	3.0369	1.30042	1.35055	-2.69	0.932498	0.487805	4.13	1.71e-07	1.64e-07	6.38e-09	3.74
D	6	416	34400	3.01703	1.24113	1.35446	-2.64839	0.898756	0.47619	4.15	1.66e-07	1.62e-07	3.33e-09	2.01
D	6	418	34443	2.96477	1.27782	1.31837	-2.69458	0.89777	0.465116	4.17	1.69e-07	1.65e-07	4.34e-09	2.56
D	6	420	34485	2.8511	1.30187	1.32529	-2.71347	0.904648	0.47619	4.19	1.72e-07	1.67e-07	5.57e-09	3.23
D	6	422	34527	2.59394	1.34824	1.33204	-2.68318	0.891031	0.47619	4.21	1.72e-07	1.67e-07	5.23e-09	3.04
D	6	424	34568	2.58043	1.38905	1.32661	-2.67444	1.04545	0.487805	4.23	1.73e-07	1.67e-07	6.38e-09	3.68
D	6	426	34609	2.52988	1.40426	1.32595	-2.67816	0.930314	0.487805	4.25	1.74e-07	1.69e-07	4.91e-09	2.81
D	6	428	34650	2.68352	1.35115	1.31234	-2.71585	0.95664	0.487805	4.27	1.73e-07	1.69e-07	4.38e-09	2.53
D	6	430	34693	2.47226	1.45991	1.35377	-2.64713	0.986684	0.465116	4.29	1.78e-07	1.73e-07	5.21e-09	2.92
D	6	432	34735	2.46565	1.48803	1.30356	-2.70276	0.802659	0.47619	4.31	1.8e-07	1.76e-07	3.99e-09	2.21
D	6	434	34776	2.51073	1.41866	1.32547	-2.68183	0.763752	0.487805	4.33	1.75e-07	1.72e-07	3.84e-09	2.19
D	6	436	34816	2.15025	2.10047	1.29154	-2.72178	0.791046	0.5	4.35	1.82e-07	1.78e-07	3.99e-09	2.2
D	6	438	34858	2.21955	2.02863	1.32141	-2.70267	0.366373	0.47619	4.37	1.84e-07	1.79e-07	4.17e-09	2.27
D	5	440	34901	2.16784	2.19457	1.30402	-2.72458	0.484703	0.465116	4.39	1.82e-07	1.75e-07	6.33e-09	3.49
D	5	442	34940	2.15682	2.21532	1.27882	-2.67261	0.304322	0.512821	4.41	1.81e-07	1.75e-07	5.95e-09	3.28
D	5	444	34976	2.19428	2.14046	1.31655	-2.6943	0.324027	0.555556	4.43	1.77e-07	1.71e-07	5.49e-09	3.11
D	5	446	35015	2.18332	2.18397	1.28754	-2.71661	0.295928	0.512821	4.45	1.79e-07	1.74e-07	5.02e-09	2.8
D	5	448	35054	2.22413	2.09655	1.32167	-2.6657	0.307264	0.512821	4.47	1.76e-07	1.72e-07	4.03e-09	2.29
D	5	450	35094	2.2241	1.99689	1.30461	-2.71012	0.293968	0.5	4.49	1.8e-07	1.76e-07	3.83e-09	2.13
D	5	452	35131	2.27402	1.91987	1.33041	-2.6798	0.282395	0.540541	4.51	1.79e-07	1.75e-07	4.51e-09	2.51
D	5	454	35177	2.25948	1.99608	1.2973	-2.70162	0.305447	0.434783	4.53	1.77e-07	1.74e-07	3.56e-09	2.01
D	5	456	35223	2.35345	1.87165	1.30719	-2.70536	0.281315	0.434783	4.55	1.78e-07	1.74e-07	3.78e-09	2.13
D	5	458	35268	2.34637	1.89283	1.33396	-2.66387	0.322089	0.444444	4.57	1.73e-07	1.69e-07	4.14e-09	2.39
D	5	460	35314	2.43311	1.76495	1.30847	-2.73064	0.31246	0.434783	4.59	1.74e-07	1.71e-07	3.81e-09	2.19
D	5	462	35353	2.44146	1.76575	1.29864	-2.71456	0.360144	0.512821	4.61	1.74e-07	1.7e-07	3.16e-09	1.82
D	5	464	35405	2.61015	1.60316	1.32203	-2.657	0.360514	0.384615	4.63	1.73e-07	1.7e-07	3.48e-09	2.01
D	5	466	35457	2.64871	1.59887	1.34127	-2.66371	0.392622	0.384615	4.65	1.72e-07	1.69e-07	3.18e-09	1.85
D	5	468	35507	2.70249	1.5743	1.31532	-2.68114	0.398026	0.4	4.67	1.72e-07	1.7e-07	2.52e-09	1.46
D	5	470	35554	2.74672	1.54344	1.32725	-2.67266	0.401525	0.425532	4.69	1.77e-07	1.73e-07	4.39e-09	2.48
D	5	472	35597	2.79022	1.51441	1.33281	-2.65537	0.398407	0.465116	4.71	1.73e-07	1.68e-07	4.27e-09	2.48
D	4	474	35688	2.79719	1.52587	1.31957	-2.66142	0.382893	0.21978	4.73	1.71e-07	1.66e-07	4.66e-09	2.73
D	4	476	35783	2.78661	1.49091	1.32729	-2.65096	0.407798	0.210526	4.75	1.73e-07	1.69e-07	3.91e-09	2.26
D	4	478	35870	2.82172	1.50895	1.31782	-2.69714	0.398802	0.229885	4.77	1.7e-07	1.66e-07	4.27e-09	2.51
D	4	480	35940	2.76803	1.5141	1.32863	-2.64386	0.411787	0.285714	4.79	1.74e-07	1.68e-07	5.26e-09	3.03
D	4	482	36002	2.8271	1.50803	1.3048	-2.68561	0.412133	0.322581	4.81	1.83e-07	1.78e-07	4.42e-09	2.42
D	3	484	36189	2.7735	1.51671	1.30413	-2.66793	0.419553	0.106952	4.83	1.82e-07	1.77e-07	5.14e-09	2.83
D	3	486	36373	2.80619	1.46577	1.26227	-2.63465	0.409344	0.108696	4.85	1.84e-07	1.78e-07	5.83e-09	3.17
D	3	488	36570				-2.64995	0.461386		4.87	1.79e-07	1.74e-07	4.93e-09	2.75
D	3	490	36781	2.79539	1.47738	1.39545	-2.63063	0.459503	0.0980392	4.89	1.8e-07	1.75e-07	4.99e-09	2.77
D	3	492	36981	2.79594	1.48516	1.31378	-2.68655	0.461801	0.1	4.91	1.79e-07	1.73e-07	5.88e-09	3.29
D	3	494	37024	2.75824	1.49771	1.31167	-2.70938	0.44541	0.465116	4.93	1.83e-07	1.78e-07	4.82e-09	2.63
D	3	496	37063	2.67999	1.53396	1.29865	-2.70325	0.424402	0.512821	4.95	1.8e-07	1.76e-07	3.92e-09	2.18
D	3	498	37101	2.44115	1.82542	1.33337	-2.68281	0.398213	0.526316	4.97	1.74e-07	1.69e-07	4.92e-09	2.83
D	3	500	37137	2.45568	1.66227	1.30595	-2.7044	0.399807	0.555556	4.99	1.73e-07	1.69e-07	3.97e-09	2.29
D	3	502	37173	2.31532	1.70629	1.31404	-2.7125	0.472396	0.555556	5.01	1.72e-07	1.67e-07	4.52e-09	2.63
D	3	504	37210	2.25984	2.12656	1.39402	-2.68655	0.279601	0.540541	5.03	1.74e-07	1.68e-07	6.08e-09	3.5
D	2	506	37250	2.17821	2.17489	1.33964	-2.72799	0.314138	0.5	5.05	1.74e-07	1.68e-07	5.74e-09	3.3
D	2	508	37285	2.19475	2.23791	1.37714	-2.68687	0.340784	0.571429	5.07	1.79e-07	1.72e-07	6.34e-09	3.55
D	2	510	37325	2.21116	2.2233	1.39263	-2.67407	0.377178	0.5	5.09	1.68e-07	1.63e-07	5.19e-09	3.09
D	2	512	37363	2.22627	2.19855	1.38757	-2.70139	0.376866	0.526316	5.11	1.86e-07	1.81e-07	5.67e-09	3.05
D	2	514	37431	2.174	2.13396	1.35885	-2.66663	0.439062	0.294118	5.13	1.85e-07	1.78e-07	6.43e-09	3.48
D	2	516	37495	2.2228	2.15584	1.37787	-2.70403	0.443504	0.3125	5.15	1.7e-07	1.64e-07	6.5e-09	3.82
D	2	518	37554	2.20843	2.1392	1.40293	-2.66963	0.469912	0.338983	5.17	1.67e-07	1.61e-07	5.57e-09	3.34
D	2	520	37613	2.20542	2.1451	1.37485	-2.69912	0.474082	0.338983	5.19	1.85e-07	1.79e-07	6.52e-09	3.52
D	2	522	37671	2.21884	2.04829	1.38908	-2.68788	0.519138	0.344828	5.21	1.89e-07	1.82e-07	7.07e-09	3.74
D	1	524	37745	2.2193	2.07765	1.38635	-2.66917	0.566301	0.27027	5.23	1.91e-07	1.85e-07	5.79e-09	3.04
D	1	526	37823	2.25949	1.9218	1.38978	-2.68829	0.581713	0.25641	5.25	1.88e-07	1.81e-07	6.53e-09	3.47
D	1	528	37898	2.35811	1.72775	1.43895	-2.58419	0.712346	0.266667	5.27	1.91e-07	1.85e-07	6.02e-09	3.16
D	1	530	37975	2.43157	1.61535	1.38951	-2.65739	0.772643	0.25974
D	1	532	38044						0.289855
D	1	534	38158						0.175439
D	1	536	38278						0.166667
D	1	538	38396						0.169492
D	1	540	38500						0.192308
D	1	542	38602						0.196078
D	1	544	38728						0.15873
D	1	546	38862						0.149254
D	1	548	38996						0.149254
D	1	550	39129						0.150376
D	1	552	39256						0.15748
*The Age-depth model is based on the software BACON 2.251. The model is based on 22 age control points with an resolution of one radiocarbon sample about every 20 cm. **The sedimentation rate for was calculated based on age modelling output at 2 cm resolution. For more details we refer to Prud'homme et al. (2022), https://doi.org/10.1038/s43247-022-00595-3.

## Sheet: Age Model_Proxy_UpperET model
SSU	SU	Depth [cm]	Age [years]	U-ratio	< 0,2 [μm]	LOG Si_Al	LOG Ti_Al	LOG Sr_Rb	Sedimentation rate [mm/yr]	Env. Magnetic Sample depth [m]	mass susc 300Hz [m3/kg]	mass susc 3000Hz [m3/kg]	Delta Susc [m3/kg]	mag sus (fd) [%]
F	20	64	21945	3.80439	1.2389	1.58206	-2.51106	1.14536		0.63	1.88e-07	1.82e-07	5.93e-09	3.16
F	20	66	21980	3.75565	1.22765	1.54645	-2.54616	1.18619	0.571429	0.65	1.85e-07	1.79e-07	6.48e-09	3.5
F	20	68	22016	3.8381	1.29893	1.495	-2.50107	1.11494	0.555556	0.67	1.87e-07	1.81e-07	6.33e-09	3.38
F	20	70	22050	3.9369	1.17585	1.57618	-2.53699	1.11263	0.588235	0.69	1.87e-07	1.81e-07	5.97e-09	3.19
F	20	72	22083	4.09145	1.19435	1.53405	-2.53285	1.08082	0.606061	0.71	1.73e-07	1.66e-07	6.61e-09	3.82
F	20	74	22114	3.73648	1.3208	1.55422	-2.5165	1.15987	0.645161	0.73	1.87e-07	1.8e-07	6.95e-09	3.72
F	20	76	22148	4.0953	1.23105	1.54832	-2.53153	1.20831	0.588235	0.75	1.71e-07	1.65e-07	5.86e-09	3.43
F	20	78	22183	3.96209	1.23601	1.53076	-2.55111	1.19384	0.571429	0.77	1.97e-07	1.91e-07	6.24e-09	3.17
F	20	80	22220	3.81583	1.3552	1.5211	-2.49237	1.1044	0.540541	0.79	1.93e-07	1.86e-07	6.6e-09	3.42
F	20	82	22257	3.89556	1.29628	1.56974	-2.44252	1.05914	0.540541	0.81	2.22e-07	2.13e-07	8.31e-09	3.75
F	20	84	22287	4.59514	1.21382	1.57352	-2.52091	1.07832	0.666667	0.83	2.14e-07	2.06e-07	8.68e-09	4.05
F	20	86	22316	4.1474	1.24799	1.49248	-2.50774	1.06549	0.689655	0.85	2.17e-07	2.1e-07	7.14e-09	3.29
F	19	88	22347	4.57417	1.18321	1.48718	-2.50964	1.06732	0.645161	0.87	2.19e-07	2.12e-07	6.88e-09	3.15
F	19	90	22378	4.15436	1.22814	1.59475	-2.46531	1.07134	0.645161	0.89	2.2e-07	2.12e-07	8.26e-09	3.75
F	19	92	22414	4.0567	1.27926	1.56212	-2.46037	1.06909	0.555556	0.91	2.17e-07	2.08e-07	9.17e-09	4.23
F	19	94	22424	4.30303	1.26568	1.57174	-2.4504	1.09045	2	0.93	2.01e-07	1.93e-07	7.49e-09	3.73
F	19	96	22434	4.29174	1.29443	1.563	-2.47028	1.08057	2	0.95	2.18e-07	2.11e-07	7.78e-09	3.56
F	19	98	22443	4.53887	1.32959	1.55421	-2.48598	1.07522	2.22222	0.97	2e-07	1.92e-07	7.69e-09	3.84
F	19	100	22453	4.19292	1.31942	1.54228	-2.40014	1.05164	2	0.99	2.22e-07	2.14e-07	8.76e-09	3.94
F	19	102	22462	4.49215	1.27036	1.53232	-2.45723	1.04206	2.22222	1.01	2.06e-07	1.98e-07	7.93e-09	3.84
F	19	104	22471	4.66492	1.23535	1.62432	-2.46744	1.06821	2.22222	1.03	2.11e-07	2.02e-07	8.85e-09	4.2
F	18	106	22481	4.89674	1.2344	1.53649	-2.48023	1.04869	2	1.05	1.97e-07	1.89e-07	7.9e-09	4.01
F	18	108	22491	4.64215	1.28692	1.61358	-2.49202	1.07894	2	1.07	2.26e-07	2.17e-07	9.15e-09	4.05
F	18	110	22500	5.64567	1.234	1.55797	-2.46306	1.06114	2.22222	1.09	2.3e-07	2.22e-07	8.28e-09	3.6
F	18	112	22509	4.44363	1.30099	1.58683	-2.48641	1.12017	2.22222	1.11	2.27e-07	2.17e-07	1.02e-08	4.52
F	18	114	22523	3.77017	1.32758	1.58834	-2.47025	1.06841	1.42857	1.13	2.25e-07	2.16e-07	9.11e-09	4.05
F	18	116	22538	4.35818	1.32417	1.54117	-2.44506	1.07412	1.33333	1.15	2.28e-07	2.2e-07	8.01e-09	3.51
F	18	118	22552	3.48628	1.37854	1.57197	-2.44924	1.13331	1.42857	1.17	2.24e-07	2.15e-07	8.4e-09	3.75
F	18	120	22565	3.52953	1.32112	1.58231	-2.49012	1.09302	1.53846	1.19	2.25e-07	2.16e-07	8.49e-09	3.78
F	18	122	22579	3.69831	1.41789	1.55849	-2.50171	1.07171	1.42857	1.21	2.36e-07	2.25e-07	1.05e-08	4.45
F	18	124	22593	3.73122	1.39506	1.5292	-2.45857	1.08523	1.42857	1.23	2.6e-07	2.49e-07	1.05e-08	4.05
F	18	126	22608	3.65272	1.43467	1.52312	-2.45028	1.05574	1.33333	1.25	2.46e-07	2.39e-07	7.52e-09	3.05
F	18	128	22624	3.60094	1.3694	1.58462	-2.40768	1.13878	1.25	1.27	2.42e-07	2.34e-07	8.12e-09	3.36
F	18	130	22639	3.49461	1.40218	1.52831	-2.48304	1.10507	1.33333	1.29	2.31e-07	2.24e-07	7.63e-09	3.3
F	18	132	22653	3.48793	1.38251	1.56165	-2.45263	1.12879	1.42857	1.31	2.36e-07	2.27e-07	8.53e-09	3.62
F	17	134	22667	3.41515	1.37928	1.53302	-2.45702	1.11945	1.42857	1.33	2.38e-07	2.3e-07	8.91e-09	3.74
F	17	136	22682	3.25686	1.34054	1.52	-2.49735	1.0432	1.33333	1.35	2.38e-07	2.28e-07	9.81e-09	4.13
F	17	138	22696	3.04774	1.44139	1.5173	-2.47975	1.01665	1.42857	1.37	2.28e-07	2.21e-07	7.21e-09	3.16
F	17	140	22710	3.24121	1.41496	1.52925	-2.44999	1.0697	1.42857	1.39	2.19e-07	2.11e-07	8.48e-09	3.87
F	17	142	22724	3.19637	1.45505	1.53457	-2.51524	1.10969	1.42857	1.41	2.36e-07	2.27e-07	8.87e-09	3.75
F	17	144	22738	3.29461	1.37798	1.53465	-2.5084	1.11778	1.42857	1.43	2.38e-07	2.3e-07	7.94e-09	3.34
F	17	146	22752	3.25577	1.38152	1.50779	-2.54019	1.05785	1.42857	1.45	2.3e-07	2.21e-07	8.7e-09	3.78
F	17	148	22768	3.04595	1.42513	1.48068	-2.55251	0.990864	1.25	1.47	2.37e-07	2.27e-07	1e-08	4.22
F	17	150	22782	2.99854	1.46002	1.50967	-2.52314	1.0432	1.42857	1.49	2.2e-07	2.11e-07	8.44e-09	3.84
F	17	152	22796	2.85313	1.4192	1.50787	-2.53976	1.03024	1.42857	1.51	2.35e-07	2.25e-07	1.01e-08	4.32
F	17	154	22809	2.90701	1.43375	1.49212	-2.55675	1.04244	1.53846	1.53	2.16e-07	2.08e-07	8.2e-09	3.8
F	17	156	22823	3.23038	1.33589	1.53165	-2.52385	1.17025	1.42857	1.55	2.34e-07	2.26e-07	7.84e-09	3.36
F	17	158	22838	3.07066	1.49559	1.55086	-2.48909	1.14009	1.33333	1.57	2.36e-07	2.28e-07	8.05e-09	3.41
F	17	160	22852	3.30482	1.48604	1.54779	-2.52414	1.08962	1.42857	1.59	2.34e-07	2.25e-07	9.24e-09	3.95
F	17	162	22866	3.47616	1.37419	1.54723	-2.49756	1.11381	1.42857	1.61	2.34e-07	2.26e-07	7.99e-09	3.41
F	17	164	22885	3.90914	1.29494	1.57332	-2.49009	1.11662	1.05263	1.63	2.04e-07	1.97e-07	7.84e-09	3.83
F	16	166	22904	3.64057	1.34805	1.55455	-2.557	1.12646	1.05263	1.65	2.25e-07	2.16e-07	9e-09	4
F	16	168	22923	3.41762	1.34356	1.5656	-2.51049	1.12208	1.05263	1.67	2.28e-07	2.2e-07	7.73e-09	3.39
F	16	170	22943	3.2803	1.37204	1.50648	-2.50333	1.14087	1	1.69	2.2e-07	2.1e-07	9.9e-09	4.5
F	16	172	22961	3.31464	1.39936	1.5035	-2.53901	1.06122	1.11111	1.71	2.26e-07	2.17e-07	9.02e-09	3.99
F	16	174	22997	3.03067	1.41529	1.54187	-2.53443	1.09732	0.555556	1.73	2.28e-07	2.18e-07	9.16e-09	4.02
F	15	176	23031	3.06417	1.41277	1.55583	-2.54373	1.13977	0.588235	1.75	2.21e-07	2.11e-07	1e-08	4.54
F	15	178	23065	2.93899	1.42973	1.52498	-2.55305	1.15287	0.588235	1.77	2.16e-07	2.07e-07	9.1e-09	4.21
F	15	180	23100	2.98004	1.4827	1.54613	-2.52582	1.12417	0.571429	1.79	2.41e-07	2.3e-07	1.06e-08	4.41
F	15	182	23134	2.97517	1.3641	1.51713	-2.53263	1.11549	0.588235	1.81	2.34e-07	2.23e-07	1.02e-08	4.37
F	15	184	23172	3.0156	1.41965	1.50815	-2.5309	1.07118	0.526316	1.83	2.44e-07	2.34e-07	1.05e-08	4.3
F	15	186	23213	3.01892	1.40328	1.53805	-2.5137	1.09588	0.487805	1.85	2.22e-07	2.12e-07	9.95e-09	4.48
F	15	188	23255	2.82436	1.44427	1.52006	-2.56048	1.1776	0.47619	1.87	2.15e-07	2.04e-07	1.14e-08	5.28
F	15	190	23294	3.13959	1.39259	1.50558	-2.57314	1.13628	0.512821	1.89	2.33e-07	2.24e-07	9.36e-09	4.01
F	15	192	23331	3.02339	1.42783	1.54323	-2.50683	0.990457	0.540541	1.91	2.53e-07	2.41e-07	1.23e-08	4.86
F	15	194	23373	2.76563	1.48015	1.50421	-2.5364	0.975161	0.47619	1.93	2.39e-07	2.24e-07	1.44e-08	6.03
F	15	196	23418	2.84546	1.43649	1.48868	-2.59304	1.03847	0.444444	1.95	2.34e-07	2.2e-07	1.47e-08	6.26
F	15	198	23460	2.61754	1.51189	1.48691	-2.57398	1.03274	0.47619	1.97	2.31e-07	2.17e-07	1.44e-08	6.23
F	15	200	23499	2.72966	1.3799	1.48384	-2.60072	1.09653	0.512821	1.99	2.31e-07	2.16e-07	1.5e-08	6.51
F	15	202	23538	2.93108	1.44273	1.50014	-2.55592	1.08189	0.512821	2.01	2.33e-07	2.2e-07	1.31e-08	5.62
F	15	204	23580	3.05007	1.43305	1.50817	-2.55532	1.11829	0.47619	2.03	2.32e-07	2.17e-07	1.47e-08	6.32
F	15	206	23622	2.69178	1.46699	1.50245	-2.5704	1.09171	0.47619	2.05	2.42e-07	2.26e-07	1.53e-08	6.35
F	15	208	23667	3.10383	1.41648	1.50171	-2.5237	1.08271	0.444444	2.07	2.1e-07	1.94e-07	1.51e-08	7.21
F	15	210	23708	3.03838	1.39499	1.53246	-2.57524	1.16955	0.487805	2.09	2.37e-07	2.2e-07	1.64e-08	6.94
F	15	212	23748	3.28973	1.34751	1.49117	-2.56827	1.08078	0.5	2.11	2.32e-07	2.16e-07	1.62e-08	6.99
F	15	214	23785	2.87268	1.38851	1.51349	-2.59376	1.02107	0.540541	2.13	2.44e-07	2.29e-07	1.53e-08	6.28
F	14	216	23826	3.08202	1.30771	1.49837	-2.53809	1.07079	0.487805	2.15	2.45e-07	2.29e-07	1.61e-08	6.56
F	14	218	23866	3.03956	1.40567	1.51714	-2.55372	1.09364	0.5	2.17	2.47e-07	2.3e-07	1.7e-08	6.89
F	14	220	23906	3.28503	1.37956	1.54871	-2.523	1.05041	0.5	2.19	2.41e-07	2.25e-07	1.66e-08	6.89
F	14	222	23945	3.34499	1.29633	1.52845	-2.50976	1.06429	0.512821	2.21	2.37e-07	2.19e-07	1.81e-08	7.65
F	14	224	23964	3.30676	1.31986	1.51776	-2.51565	1.05072	1.05263	2.23	2.41e-07	2.23e-07	1.8e-08	7.46
F	14	226	23983	3.49101	1.30707	1.57879	-2.50418	0.99917	1.05263	2.25	2.27e-07	2.1e-07	1.71e-08	7.54
F	14	228	24002	3.27275	1.35409	1.52653	-2.5704	1.03725	1.05263	2.27	2.26e-07	2.09e-07	1.75e-08	7.73
F	14	230	24021	3.4967	1.31744	1.51101	-2.54331	1.03058	1.05263	2.29	2.42e-07	2.24e-07	1.81e-08	7.46
F	14	232	24040	3.59849	1.27298	1.54148	-2.52227	1.06676	1.05263	2.31	2.51e-07	2.32e-07	1.85e-08	7.36
F	14	234	24059	4.08485	1.17776	1.57621	-2.45798	1.05041	1.05263	2.33	2.48e-07	2.27e-07	2.1e-08	8.46
F	14	236	24078	4.05287	1.22235	1.52163	-2.45641	0.968539	1.05263	2.35	2.66e-07	2.49e-07	1.76e-08	6.61
F	14	238	24097	4.8562	1.2104	1.58222	-2.43734	0.967082	1.05263	2.37	2.5e-07	2.31e-07	1.89e-08	7.57
F	13	240	24116	4.45179	1.14947	1.56449	-2.48369	0.973956	1.05263	2.39	2.62e-07	2.43e-07	1.89e-08	7.22
F	13	242	24135	4.54819	1.18288	1.53022	-2.42887	0.968338	1.05263	2.41	2.56e-07	2.36e-07	2.05e-08	8
F	13	244	24154	4.29231	1.19781	1.57292	-2.43122	0.997666	1.05263	2.43	2.76e-07	2.56e-07	2e-08	7.23
F	13	246	24173	4.36327	1.25435	1.60806	-2.39347	1.07941	1.05263	2.45	3.28e-07	3.04e-07	2.38e-08	7.27
F	13	248	24192	4.64029	1.28136	1.5741	-2.34499	1.06662	1.05263	2.47	2.95e-07	2.76e-07	1.91e-08	6.47
F	13	250	24211	4.12942	1.24164	1.56725	-2.2929	1.04376	1.05263	2.49	3.12e-07	2.93e-07	1.92e-08	6.16
F	13	252	24230	3.9721	1.28484	1.59394	-2.29905	1.09982	1.05263	2.51	2.79e-07	2.62e-07	1.67e-08	5.99
F	13	254	24249	4.52049	1.20811	1.52311	-2.40307	1.04761	1.05263	2.53	2.79e-07	2.63e-07	1.6e-08	5.74
F	13	256	24268	3.53269	1.34113	1.5623	-2.42264	1.01071	1.05263	2.55	2.05e-07	1.93e-07	1.17e-08	5.73
F	13	258	24287	4.48856	1.25908	1.57837	-2.52614	1.06366	1.05263	2.57	2.37e-07	2.28e-07	9.01e-09	3.81
F	13	260	24300	3.58967	1.33698	1.59621	-2.44777	0.995679	1.53846	2.59	2.42e-07	2.33e-07	8.68e-09	3.59
