# Supplementary material for: What do dust sinks tell us about their sources and past environmental dynamics? A case study for oxygen isotope stages 3–2 in the Middle Rhine Valley, Germany
Source: Copernicus journal article supplement (doi:10.5194/egqsj-72-163-2023), 2023-08-04
Supplement: Supplementary file 1 [file egqsj-72-163-2023-supplement.zip › Table ST2.xlsx]

## Sheet: Sr_Nd_Model_lower
Median 14C age cal BP*	Min 14C age cal BP*	Max 14C age cal BP*	Sr Isotopes	Epsilon Nd	m	cm	Sampling Intervall
31624	31203	32108	0.722	-10.95	2.85-2.90	287.5	25
32153	31629	32713	0.722	-10.87	3.10-3.15	312.5	15
32451	32012	33023	0.724	-11.22	3.25-3.30	327.5	30
33108	32786	33483	0.724	-11.48	3.55-3.60	357.5	20
33611	33257	33942	0.725	-11.46	3.75-3.80	377.5	5
33718	33335	34078	0.725	-10.99	3.80-3.85	382.5	10
33938	33581	34243	0.727	-11.83	3.90-3.95	392.5	15
34247	33933	34538	0.727	-11.53	4.05-4.10	407.5	15
34556	34236	34914	0.728	-11.67	4.20-4.25	422.5	15
34857	34550	35230	0.73	-11.98	4.35-4.40	437.5	10
35053	34709	35440	0.73	-11.95	4.45-4.50	447.5	10
35263	34881	35670	0.73	-11.8	4.55-4.60	457.5	10
35495	35060	35961	0.729	-11.89	4.65-4.70	467.5	15
36094	35446	36803	0.728	-11.65	4.80-4.85	482.5	5
36557	36072	37031	0.727	-11.71	4.85-4.90	487.5	15
37192	36606	37867	0.727	-11.4	5.00-5.05	502.5	10
37392	36821	38185	0.727	-11.51	5.10-5.15	512.5	10
37711	37075	38534	0.726	-11.58	5.20-5.25	522.5	10
38091	37368	38887	0.726	-11.6	5.30-5.35	532.5	10
38688	37741	39497	0.725	-11.67	5.40-5.45	542.5	10
39323	38180	39962	0.724032	-10.7678	5.50-5.55	552.5

## Sheet: Sr_Nd_Model_upper
Median 14C age cal BP*	Min 14C age cal BP*	Max 14C age cal BP*	Sr Isotopes	Epsilon Nd	m	cm	Sampling intervall
22282	21938	22435	0.725	-11.5	0.80-0.85	82.5	45
22622	22504	22774	0.726	-11.9	1.25-1.30	127.5	30
22834	22697	22997	0.726	-11.82	1.55-1.60	157.5	20
23067	22914	23329	0.726	-11.42	1.75-1.80	177.5	30
23705	23405	24168	0.726	-11.68	2.05-2.10	207.5	15
24144	23871	24705	0.725	-11.61	2.20-2.25	222.5	25
24200	28242	30410	0.725	-11.47	2.45-2.50	247.5
