# Supplementary material for: What do dust sinks tell us about their sources and past environmental dynamics? A case study for oxygen isotope stages 3–2 in the Middle Rhine Valley, Germany
Source: Copernicus journal article supplement (doi:10.5194/egqsj-72-163-2023), 2023-08-04
Supplement: Supplementary file 1 [file egqsj-72-163-2023-supplement.zip › Table ST3.xlsx]

## Sheet: MIXING EQUATIONS
TWO SOURCE MIXING
		87Sr/86Sr	Sr [PPM]	Epsilon Nd	Nd [PPM]					87Sr/86Sr	Sr [PPM]	Epsilon Nd	Nd [PPM]
	Rhine (MEAN)	0.719667	194.654	-9.32	11.11				Rhine (MEAN)	0.719667	194.654	-9.32	11.11
	Rhenish Massif (MEAN)	0.740666	98	-13.3697	44.388				Periglacial Slope Deposits	0.736407	110	-13.9019	44.6433
Percentage	Fractions							Percentage	Fractions
0	0	0.740666	98	-13.3697	44.388			0	0	0.736407	110	-13.9019	44.6433
10	0.1	0.736869	107.665	-13.2601	41.0602			10	0.1	0.733656	118.465	-13.7787	41.29
20	0.2	0.733698	117.331	-13.1312	37.7324			20	0.2	0.731272	126.931	-13.6336	37.9367
30	0.3	0.73101	126.996	-12.9774	34.4046			30	0.3	0.729187	135.396	-13.4604	34.5833
40	0.4	0.728702	136.661	-12.7906	31.0768			40	0.4	0.727347	143.861	-13.2499	31.23
50	0.5	0.726699	146.327	-12.559	27.749			50	0.5	0.725711	152.327	-12.9889	27.8767
60	0.6	0.724944	155.992	-12.2643	24.4212			60	0.6	0.724248	160.792	-12.6565	24.5233
70	0.7	0.723394	165.658	-11.8766	21.0934			70	0.7	0.722931	169.258	-12.2187	21.17
80	0.8	0.722015	175.323	-11.3436	17.7656			80	0.8	0.721739	177.723	-11.6162	17.8167
90	0.9	0.720779	184.988	-10.565	14.4378			90	0.9	0.720656	186.188	-10.7343	14.4633
100	1	0.719667	194.654	-9.32	11.11			100	1	0.719667	194.654	-9.32	11.11
		87Sr/86Sr	Sr [PPM]	Epsilon Nd	Nd [PPM]					87Sr/86Sr	Sr [PPM]	Epsilon Nd	Nd [PPM]
	Odenwald (MEAN)	0.708983	207	-5.13033	11.9				Eifel (Laacher See Tephra)	0.70477	500	-0.351125	49
	Rhenish Massif (MEAN)	0.740666	98	-13.3697	44.388				Rhenish Massif (MEAN)	0.740666	98	-13.3697	44.388
Percentage	Fractions							Percentage	Fractions
0	0	0.740666	98	-13.3697	44.388			0	0	0.740666	98	-13.3697	44.388
10	0.1	0.734644	108.9	-13.1313	41.1392			10	0.1	0.727679	138.2	-11.9473	44.8492
20	0.2	0.729717	119.8	-12.8521	37.8904			20	0.2	0.720545	178.4	-10.5539	45.3104
30	0.3	0.725612	130.7	-12.5206	34.6416			30	0.3	0.716035	218.6	-9.18863	45.7716
40	0.4	0.722139	141.6	-12.1204	31.3928			40	0.4	0.712926	258.8	-7.85057	46.2328
50	0.5	0.719163	152.5	-11.6278	28.144			50	0.5	0.710653	299	-6.53893	46.694
60	0.6	0.716584	163.4	-11.0066	24.8952			60	0.6	0.708918	339.2	-5.25296	47.1552
70	0.7	0.714327	174.3	-10.199	21.6464			70	0.7	0.707552	379.4	-3.99189	47.6164
80	0.8	0.712336	185.2	-9.10615	18.3976			80	0.8	0.706447	419.6	-2.75502	48.0776
90	0.9	0.710566	196.1	-7.54456	15.1488			90	0.9	0.705535	459.8	-1.54165	48.5388
100	1	0.708983	207	-5.13033	11.9			100	1	0.70477	500	-0.351125	49
		87Sr/86Sr	Sr [PPM]	Epsilon Nd	Nd [PPM]					87Sr/86Sr	Sr [PPM]	Epsilon Nd	Nd [PPM]
	Odenwald (MEAN)	0.708983	207	-5.13033	11.9				Siebengebirge/Westerwald (MEAN)	0.703765	958.2	3.59708	51.21
	Rhine (MEAN)	0.719667	194.654	-9.32	11.11				Rhenish Massif (MEAN)	0.740666	98	-13.3697	44.388
Percentage	Fractions							Percentage	Fractions
0	0	0.719667	194.654	-9.32	11.11			0	0	0.740666	98	-13.3697	44.388
10	0.1	0.718538	195.888	-8.87441	11.189			10	0.1	0.721451	184.02	-11.4419	45.0702
20	0.2	0.717423	197.123	-8.43507	11.268			20	0.2	0.714478	270.04	-9.57154	45.7524
30	0.3	0.716322	198.358	-8.00184	11.347			30	0.3	0.710874	356.06	-7.75618	46.4346
40	0.4	0.715235	199.592	-7.57461	11.426			40	0.4	0.708673	442.08	-5.99338	47.1168
50	0.5	0.714161	200.827	-7.15324	11.505			50	0.5	0.707189	528.1	-4.28091	47.799
60	0.6	0.7131	202.061	-6.73762	11.584			60	0.6	0.70612	614.12	-2.61663	48.4812
70	0.7	0.712052	203.296	-6.32763	11.663			70	0.7	0.705314	700.14	-0.998534	49.1634
80	0.8	0.711017	204.531	-5.92316	11.742			80	0.8	0.704685	786.16	0.575269	49.8456
90	0.9	0.709994	205.765	-5.52409	11.821			90	0.9	0.704179	872.18	2.10657	50.5278
100	1	0.708983	207	-5.13033	11.9			100	1	0.703765	958.2	3.59708	51.21
